# Supplementary material for: Facile Synthesis of Novel CaIn2S4/ZnIn2S4 Composites with Efficient Performance for Photocatalytic Reduction of Cr(VI) under Simulated Sunlight Irradiation
Source: MDPI journal article supplement (doi:10.3390/nano8070472), 2018-06-27
Supplement: s1 [file s1]

## Supplementary Materials

### Facile synthesis of novel $\text{CaIn}_2\text{S}_4/\text{ZnIn}_2\text{S}_4$ composites with efficient performance for photocatalytic reduction of $\text{Cr(VI)}$ under simulated sunlight irradiation

Siyu Xu<sup>1</sup>, Jun Dai<sup>1,3</sup>, Juan Yang<sup>1,2,3\*</sup>, Jun You<sup>2</sup> and Jingyi Hao<sup>2</sup>

<sup>1</sup> Institute of Chemical Safety, School of Safety Science and Engineering, Henan Polytechnic University, Jiaozuo 454003, P.R. China; xusiyu2017@163.com; daijun@hpu.edu.cn

<sup>2</sup> Institute of Applied Chemistry, College of Chemistry and Chemical Engineering, Henan Polytechnic University, Jiaozuo 454003, P.R. China; youjunhpu@163.com; haojingyi2018@163.com

<sup>3</sup> The Collaborative Innovation Center of Coal Safety Production of Henan, Henan Polytechnic University, Jiaozuo 454003, P.R. China

\* Correspondence: yangjuanhpu@163.com; Tel.: +86-391-398-7881

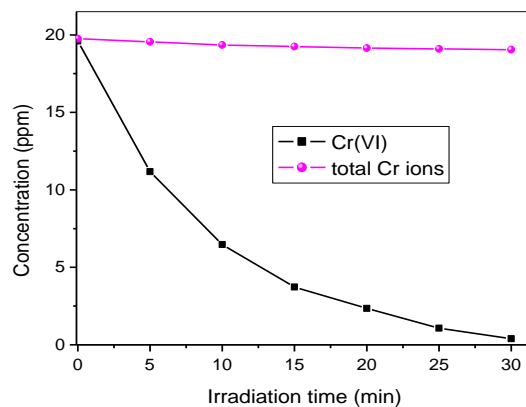

**Figure S1.** Concentrations of  $\text{Cr(VI)}$  and total  $\text{Cr}$  ions in the photocatalytic reaction solution over 30%  $\text{CaIn}_2\text{S}_4/\text{ZnIn}_2\text{S}_4$  catalyst under simulated sunlight irradiation.

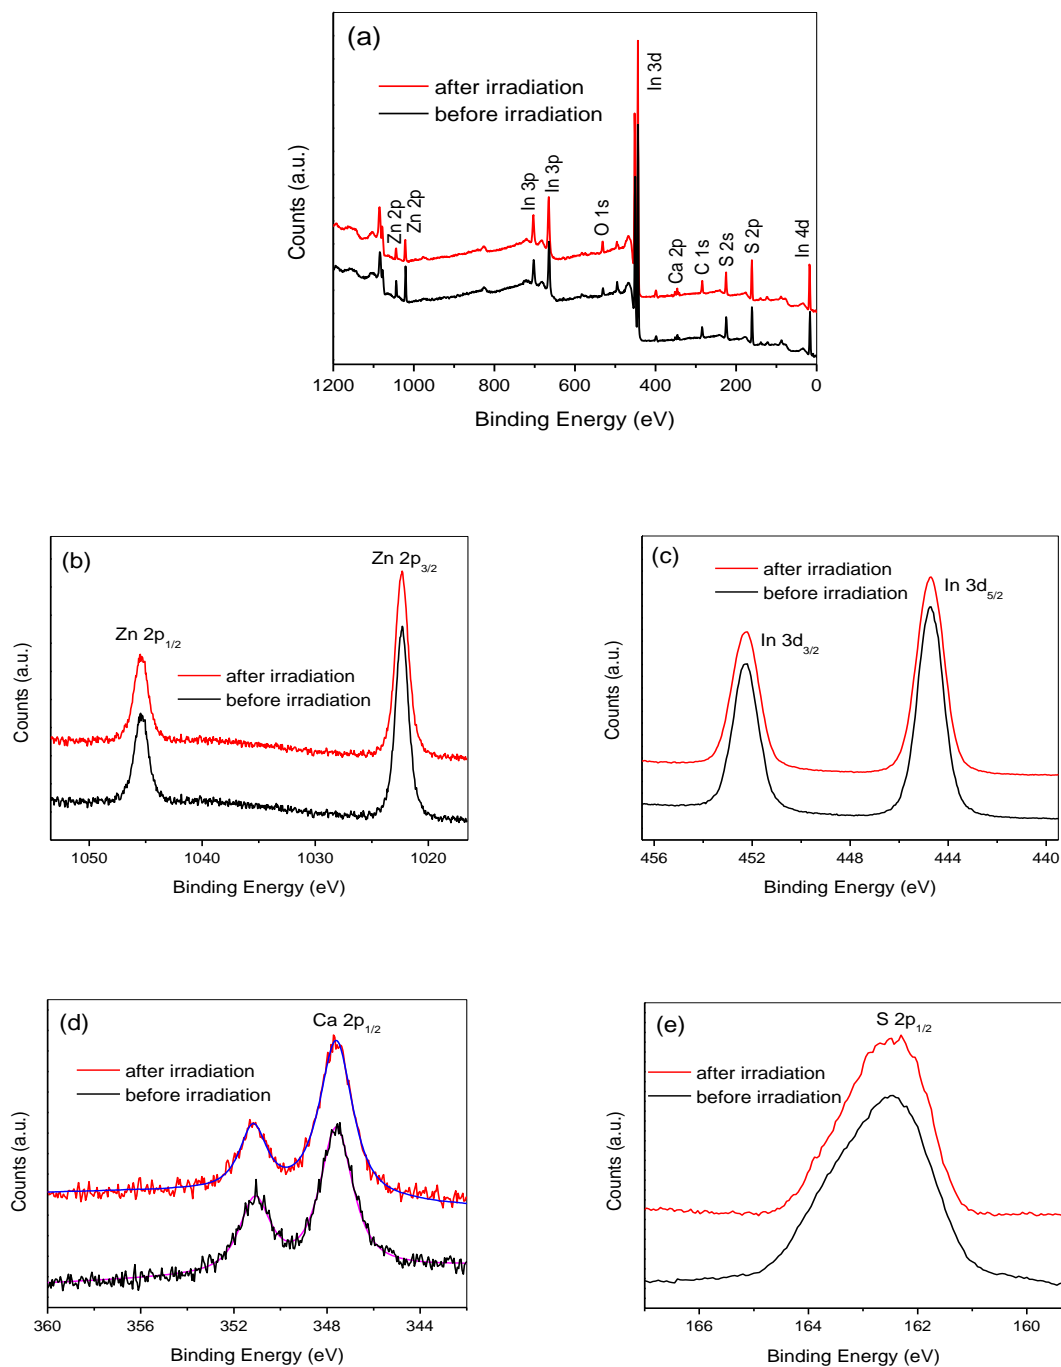

**Figure S2.** XPS survey spectra (a), high-resolution XPS spectra of Zn 2p (b), In 3d (c), Ca 2p (d), and S 2p (e) of 30% CaIn<sub>2</sub>S<sub>4</sub>/ZnIn<sub>2</sub>S<sub>4</sub> composite sample before and after the photocatalytic reaction, respectively.
